# Supplementary material for: STAT4 and the Risk of Rheumatoid Arthritis and Systemic Lupus Erythematosus
Source: Atypon-hosted journal article supplement (doi:10.1056/nejmoa073003), 2007-09-05

## Supplementary Appendix

This appendix has been provided by the authors to give readers additional information about their work.

Supplement to: Remmers EF, Plenge RM, Lee AT, et al. *STAT4* and the risk of rheumatoid arthritis and systemic lupus erythematosus. *N Engl J Med* 2007;357:977-86.

Supplementary Table S1: **Chromosome 2q RA Linkage Peak Candidate Genes.**

| <i>Gene Symbol</i> | <i>Gene Identification</i>                                             |
|--------------------|------------------------------------------------------------------------|
| <i>NOSTRIN</i>     | Nitric oxide synthase traffic inducer                                  |
| <i>WASPIP</i>      | Wiskott-Aldrich syndrome protein interacting protein                   |
| <i>FRZB</i>        | Frizzled-related protein                                               |
| <i>STAT1</i>       | Signal transducer and activator of transcription 1                     |
| <i>STAT4</i>       | Signal transducer and activator of transcription 4                     |
| <i>HSPD1</i>       | Heat shock 60kDa protein 1 (chaperonin)                                |
| <i>CFLAR</i>       | CASP8 and FADD-like apoptosis regulator                                |
| <i>CASP10</i>      | Caspase 10, apoptosis-related cysteine peptidase                       |
| <i>CASP8</i>       | Caspase 8, apoptosis-related cysteine peptidase                        |
| <i>BMPR2</i>       | Bone morphogenetic protein receptor, type II (serine/threonine kinase) |
| <i>CD28</i>        | CD28 antigen                                                           |
| <i>CTLA4</i>       | Cytotoxic T-lymphocyte-associated protein 4                            |
| <i>ICOS</i>        | Inducible T-cell co-stimulator                                         |

Supplementary Table S2: Association of *STAT1/STAT4* Region SNPs with Disease Susceptibility in 607 Independent NARAC RA Cases and 1309 Unrelated Controls.

| #  | Name       | Assoc Allele | Freq in cases | Freq in controls | Chi square | P value  |
|----|------------|--------------|---------------|------------------|------------|----------|
| 1  | rs3088307  | G            | 0.48          | 0.45             | 2.73       | 0.099    |
| 2  | rs16824035 | C            | 0.86          | 0.85             | 0.30       | 0.587    |
| 3  | rs6718902  | C            | 0.74          | 0.74             | 0.31       | 0.581    |
| 4  | rs13395505 | G            | 0.60          | 0.59             | 0.54       | 0.464    |
| 5  | rs17749316 | C            | 0.93          | 0.93             | 0.00       | 0.984    |
| 6  | rs1547550  | G            | 0.66          | 0.65             | 0.26       | 0.612    |
| 7  | rs2280234  | G            | 0.61          | 0.59             | 0.87       | 0.350    |
| 8  | rs2280233  | C            | 0.48          | 0.46             | 1.90       | 0.168    |
| 9  | rs2280232  | T            | 0.78          | 0.76             | 1.59       | 0.208    |
| 10 | rs13005843 | C            | 0.93          | 0.93             | 0.48       | 0.490    |
| 11 | rs11887698 | A            | 0.85          | 0.84             | 0.21       | 0.645    |
| 12 | rs10199181 | A            | 0.60          | 0.60             | 0.02       | 0.877    |
| 13 | rs13029532 | A            | 0.93          | 0.93             | 0.10       | 0.752    |
| 14 | rs10208033 | T            | 0.58          | 0.57             | 0.03       | 0.869    |
| 15 | rs1467199  | C            | 0.75          | 0.75             | 0.02       | 0.899    |
| 16 | rs16833177 | T            | 0.79          | 0.79             | 0.24       | 0.623    |
| 17 | rs4853456  | A            | 0.83          | 0.82             | 0.81       | 0.368    |
| 18 | rs3024904  | T            | 0.11          | 0.10             | 0.11       | 0.740    |
| 19 | rs3024936  | G            | 0.04          | 0.03             | 1.53       | 0.216    |
| 20 | rs925847   | C            | 0.73          | 0.72             | 0.23       | 0.634    |
| 21 | rs6749371  | T            | 0.07          | 0.07             | 0.00       | 1.000    |
| 22 | rs6715106  | G            | 0.05          | 0.05             | 0.63       | 0.428    |
| 23 | rs16833215 | G            | 0.34          | 0.30             | 5.10       | 0.024    |
| 24 | rs16833220 | G            | 0.16          | 0.15             | 0.08       | 0.780    |
| 25 | rs3024866  | C            | 0.28          | 0.25             | 3.62       | 0.057    |
| 26 | rs932169   | C            | 0.09          | 0.08             | 0.15       | 0.702    |
| 27 | rs1517352  | A            | 0.43          | 0.38             | 6.10       | 0.014    |
| 28 | rs13017460 | A            | 0.44          | 0.40             | 4.83       | 0.028    |
| 29 | rs2459611  | T            | 0.90          | 0.90             | 0.13       | 0.715    |
| 30 | rs7601754  | A            | 0.83          | 0.82             | 0.17       | 0.683    |
| 31 | rs11889341 | T            | 0.28          | 0.22             | 13.08      | 3.00E-04 |
| 32 | rs13010752 | T            | 0.91          | 0.91             | 0.19       | 0.662    |
| 33 | rs12998748 | G            | 0.91          | 0.91             | 0.12       | 0.733    |
| 34 | rs6434435  | G            | 0.83          | 0.83             | 0.23       | 0.630    |
| 35 | rs10931481 | G            | 0.36          | 0.31             | 7.98       | 0.005    |
| 36 | rs13011805 | C            | 0.91          | 0.91             | 0.02       | 0.882    |
| 37 | rs7574865  | T            | 0.28          | 0.22             | 15.49      | 8.29E-05 |
| 38 | rs8179673  | C            | 0.28          | 0.22             | 12.41      | 4.00E-04 |
| 39 | rs10181656 | G            | 0.28          | 0.22             | 13.36      | 3.00E-04 |
| 40 | rs13401064 | C            | 0.92          | 0.92             | 0.11       | 0.745    |
| 41 | rs16833260 | G            | 0.36          | 0.32             | 6.91       | 0.009    |
| 42 | rs6752770  | G            | 0.31          | 0.29             | 1.92       | 0.166    |
| 43 | rs7599504  | T            | 0.84          | 0.84             | 0.37       | 0.545    |
| 44 | rs4341966  | T            | 0.23          | 0.21             | 2.14       | 0.144    |
| 45 | rs17769459 | T            | 0.06          | 0.05             | 0.31       | 0.579    |
| 46 | rs2356350  | G            | 0.41          | 0.40             | 0.06       | 0.811    |
| 47 | rs11685878 | T            | 0.42          | 0.41             | 0.55       | 0.457    |
| 48 | rs4853546  | G            | 0.65          | 0.65             | 0.00       | 0.976    |
| 49 | rs1031509  | C            | 0.73          | 0.73             | 0.22       | 0.639    |
| 50 | rs12327969 | C            | 0.23          | 0.22             | 0.04       | 0.834    |
| 51 | rs10497711 | G            | 0.09          | 0.07             | 4.73       | 0.030    |
| 52 | rs7572482  | A            | 0.35          | 0.35             | 0.26       | 0.614    |
| 53 | rs2278940  | A            | 0.09          | 0.07             | 3.85       | 0.050    |
| 54 | rs897200   | A            | 0.37          | 0.36             | 0.21       | 0.646    |
| 55 | rs16833437 | T            | 0.37          | 0.36             | 0.30       | 0.587    |
| 56 | rs1031507  | T            | 0.35          | 0.34             | 0.21       | 0.645    |
| 57 | rs13001658 | G            | 0.72          | 0.71             | 0.53       | 0.468    |
| 58 | rs1869624  | A            | 0.31          | 0.30             | 0.08       | 0.779    |
| 59 | rs4853550  | G            | 0.21          | 0.19             | 1.07       | 0.302    |
| 60 | rs4853551  | T            | 0.09          | 0.08             | 0.25       | 0.618    |
| 61 | rs12467660 | A            | 0.13          | 0.11             | 2.10       | 0.147    |
| 62 | rs2054090  | A            | 0.25          | 0.25             | 0.23       | 0.636    |
| 63 | rs7595886  | T            | 0.13          | 0.12             | 0.65       | 0.420    |

Supplementary Table S3: Association of *STAT1/STAT4* Region SNPs with Disease Susceptibility in 1013 anti-CCP Positive Singleton RA Cases and 1326 Controls.

| #  | Name       | Assoc Allele | Freq in cases | Freq in ctrls | Chi square | P value  |
|----|------------|--------------|---------------|---------------|------------|----------|
| 1  | rs3088307  | G            | 0.44          | 0.43          | 0.83       | 0.362    |
| 2  | rs16824035 | C            | 0.85          | 0.85          | 0.07       | 0.791    |
| 3  | rs6718902  | T            | 0.26          | 0.25          | 1.75       | 0.186    |
| 4  | rs13395505 | A            | 0.42          | 0.41          | 0.35       | 0.556    |
| 5  | rs17749316 | G            | 0.08          | 0.07          | 2.63       | 0.105    |
| 6  | rs1547550  | C            | 0.37          | 0.36          | 0.79       | 0.375    |
| 7  | rs2280234  | G            | 0.58          | 0.58          | 0.06       | 0.811    |
| 8  | rs2280233  | C            | 0.46          | 0.45          | 0.76       | 0.384    |
| 9  | rs2280232  | T            | 0.76          | 0.74          | 3.95       | 0.047    |
| 10 | rs13005843 | C            | 0.94          | 0.92          | 6.81       | 0.009    |
| 11 | rs11887698 | A            | 0.83          | 0.83          | 0.57       | 0.452    |
| 12 | rs10199181 | T            | 0.41          | 0.41          | 0.00       | 0.963    |
| 13 | rs13029532 | A            | 0.94          | 0.92          | 6.62       | 0.010    |
| 14 | rs10208033 | T            | 0.56          | 0.54          | 0.83       | 0.361    |
| 15 | rs1467199  | C            | 0.75          | 0.75          | 0.00       | 0.949    |
| 16 | rs16833177 | T            | 0.79          | 0.78          | 0.07       | 0.793    |
| 17 | rs4853456  | A            | 0.83          | 0.80          | 8.18       | 0.004    |
| 18 | rs3024904  | A            | 0.91          | 0.89          | 3.49       | 0.062    |
| 19 | rs3024936  | G            | 0.03          | 0.03          | 1.30       | 0.254    |
| 20 | rs925847   | C            | 0.73          | 0.71          | 2.49       | 0.114    |
| 21 | rs6749371  | A            | 0.94          | 0.93          | 2.61       | 0.107    |
| 22 | rs6715106  | A            | 0.95          | 0.94          | 0.50       | 0.480    |
| 23 | rs16833215 | G            | 0.32          | 0.31          | 0.52       | 0.470    |
| 24 | rs16833220 | G            | 0.15          | 0.15          | 0.01       | 0.924    |
| 25 | rs3024866  | C            | 0.27          | 0.26          | 0.11       | 0.737    |
| 26 | rs932169   | C            | 0.08          | 0.08          | 0.00       | 0.975    |
| 27 | rs1517352  | A            | 0.42          | 0.40          | 1.46       | 0.227    |
| 28 | rs13017460 | A            | 0.44          | 0.42          | 3.77       | 0.052    |
| 29 | rs2459611  | T            | 0.90          | 0.88          | 4.38       | 0.036    |
| 30 | rs7601754  | A            | 0.84          | 0.81          | 7.13       | 0.008    |
| 31 | rs11889341 | T            | 0.27          | 0.22          | 16.88      | 3.98E-05 |
| 32 | rs13010752 | T            | 0.91          | 0.90          | 3.76       | 0.053    |
| 33 | rs12998748 | G            | 0.91          | 0.90          | 2.19       | 0.139    |
| 34 | rs6434435  | G            | 0.84          | 0.81          | 8.09       | 0.004    |
| 35 | rs10931481 | G            | 0.35          | 0.31          | 5.01       | 0.025    |
| 36 | rs13011805 | C            | 0.92          | 0.89          | 6.95       | 0.008    |
| 37 | rs7574865  | T            | 0.27          | 0.22          | 11.70      | 6.00E-04 |
| 38 | rs8179673  | C            | 0.27          | 0.22          | 13.16      | 3.00E-04 |
| 39 | rs10181656 | G            | 0.27          | 0.22          | 15.64      | 7.65E-05 |
| 40 | rs13401064 | C            | 0.93          | 0.92          | 2.88       | 0.090    |
| 41 | rs16833260 | G            | 0.35          | 0.32          | 2.80       | 0.094    |
| 42 | rs6752770  | G            | 0.34          | 0.27          | 23.70      | 1.13E-06 |
| 43 | rs7599504  | T            | 0.86          | 0.84          | 3.77       | 0.052    |
| 44 | rs4341966  | T            | 0.23          | 0.21          | 2.30       | 0.130    |
| 45 | rs17769459 | T            | 0.06          | 0.05          | 0.54       | 0.464    |
| 46 | rs2356350  | G            | 0.42          | 0.41          | 0.33       | 0.565    |
| 47 | rs11685878 | C            | 0.59          | 0.58          | 0.63       | 0.428    |
| 48 | rs4853546  | G            | 0.66          | 0.64          | 1.69       | 0.193    |
| 49 | rs1031509  | C            | 0.74          | 0.71          | 3.61       | 0.058    |
| 50 | rs12327969 | G            | 0.78          | 0.77          | 0.26       | 0.610    |
| 51 | rs10497711 | G            | 0.07          | 0.06          | 1.12       | 0.290    |
| 52 | rs7572482  | G            | 0.65          | 0.64          | 0.80       | 0.371    |
| 53 | rs2278940  | A            | 0.07          | 0.06          | 0.55       | 0.457    |
| 54 | rs897200   | G            | 0.64          | 0.63          | 0.83       | 0.364    |
| 55 | rs16833437 | G            | 0.64          | 0.63          | 1.31       | 0.252    |
| 56 | rs1031507  | G            | 0.66          | 0.64          | 1.14       | 0.286    |
| 57 | rs13001658 | G            | 0.73          | 0.70          | 4.34       | 0.037    |
| 58 | rs1869624  | A            | 0.30          | 0.30          | 0.02       | 0.902    |
| 59 | rs4853550  | T            | 0.82          | 0.80          | 1.07       | 0.301    |
| 60 | rs4853551  | C            | 0.92          | 0.91          | 0.02       | 0.882    |
| 61 | rs12467660 | C            | 0.89          | 0.89          | 0.03       | 0.855    |
| 62 | rs2054090  | T            | 0.76          | 0.74          | 1.03       | 0.309    |
| 63 | rs7595886  | C            | 0.89          | 0.87          | 2.56       | 0.109    |

**Supplementary Table S4: Linkage Disequilibrium Among Disease-Associated *STAT4* SNPs.**

| SNP ident. | LD with rs7574865* |
|------------|--------------------|
| rs11889341 | 1.00               |
| rs7574865  | --                 |
| rs7568275  | 1.00               |
| rs8179673  | 0.95               |
| rs10181656 | 0.95               |
| rs7582694  | 1.00               |
| rs10174238 | 0.90               |

\* $r^2$  determined in HapMap CEU population.

## **SUPPLEMENTARY METHODS**

### **GENOTYPING**

The bead-based array method, the Illumina Golden Gate assay (Illumina, Inc.) was used to analyze 1536 SNPs in a multiplexed assay. Briefly, 250 ng of DNA was biotinylated and immobilized on streptavidin coated paramagnetic beads. Allele specific and locus specific primers were used to interrogate each SNP locus. Following primer hybridization, extension and ligation, the resulting product served as a template for PCR amplification. Using Cy3 and Cy5 labeled universal primers each allele could be specifically identified. The PCR products were then hybridized overnight to an appropriate Sentrix Array Matrix, which allows for the separation of the assay products in solution onto a solid surface for individual SNP genotype readout. A Bead Array Reader analyzed the fluorescent intensities. Genotype clusters and allele calls were generated with the BeadStudio genotyping software.

In the primer extension method (Sequenom, Inc.), multiplex PCR was used to amplify DNA products containing up to 28 SNPs in one reaction from 5 ng genomic DNA. Synthetic oligonucleotides that bind adjacent to the SNP site were then hybridized and extended with nucleotides complementary to the template SNP site using modified nucleotides that terminate the extension reaction at the interrogated SNP, thus generating alternate products of sufficiently different masses to be separated by mass spectrometry. The extended products were separated by MALDI-TOF mass spectrometry and the genotypes determined with SpectroTyper software (Sequenom). Calls were evaluated and edited by cluster analysis performed with the SpectroTyper software. Genotype data will be made available on the NARAC web site (<http://www.naracdata.org/>).

## SUPPLEMENTARY FIGURE LEGENDS

### Supplementary Figure S1: **Imputing SNPs.**

The genotypes at two SNPs, rs1517352 and rs7601754 (red asterisks), are used to “impute” the genotype at rs7574865 with an  $r^2 = 0.91$  (based on CEU HapMap). That is, when a chromosome contains an “A” allele at both rs1517352 and rs7601754, this accurately predicts a “G” allele at rs7574865. Any other combination predicts a “T” allele at rs7574865. The number of imputed SNPs at a locus depends upon the size and linkage disequilibrium structure. Additional tutorial material is available through the HapMap website at <http://www.hapmap.org/downloads/presentations/> (download the presentation file “2\_Daly.ppt”).

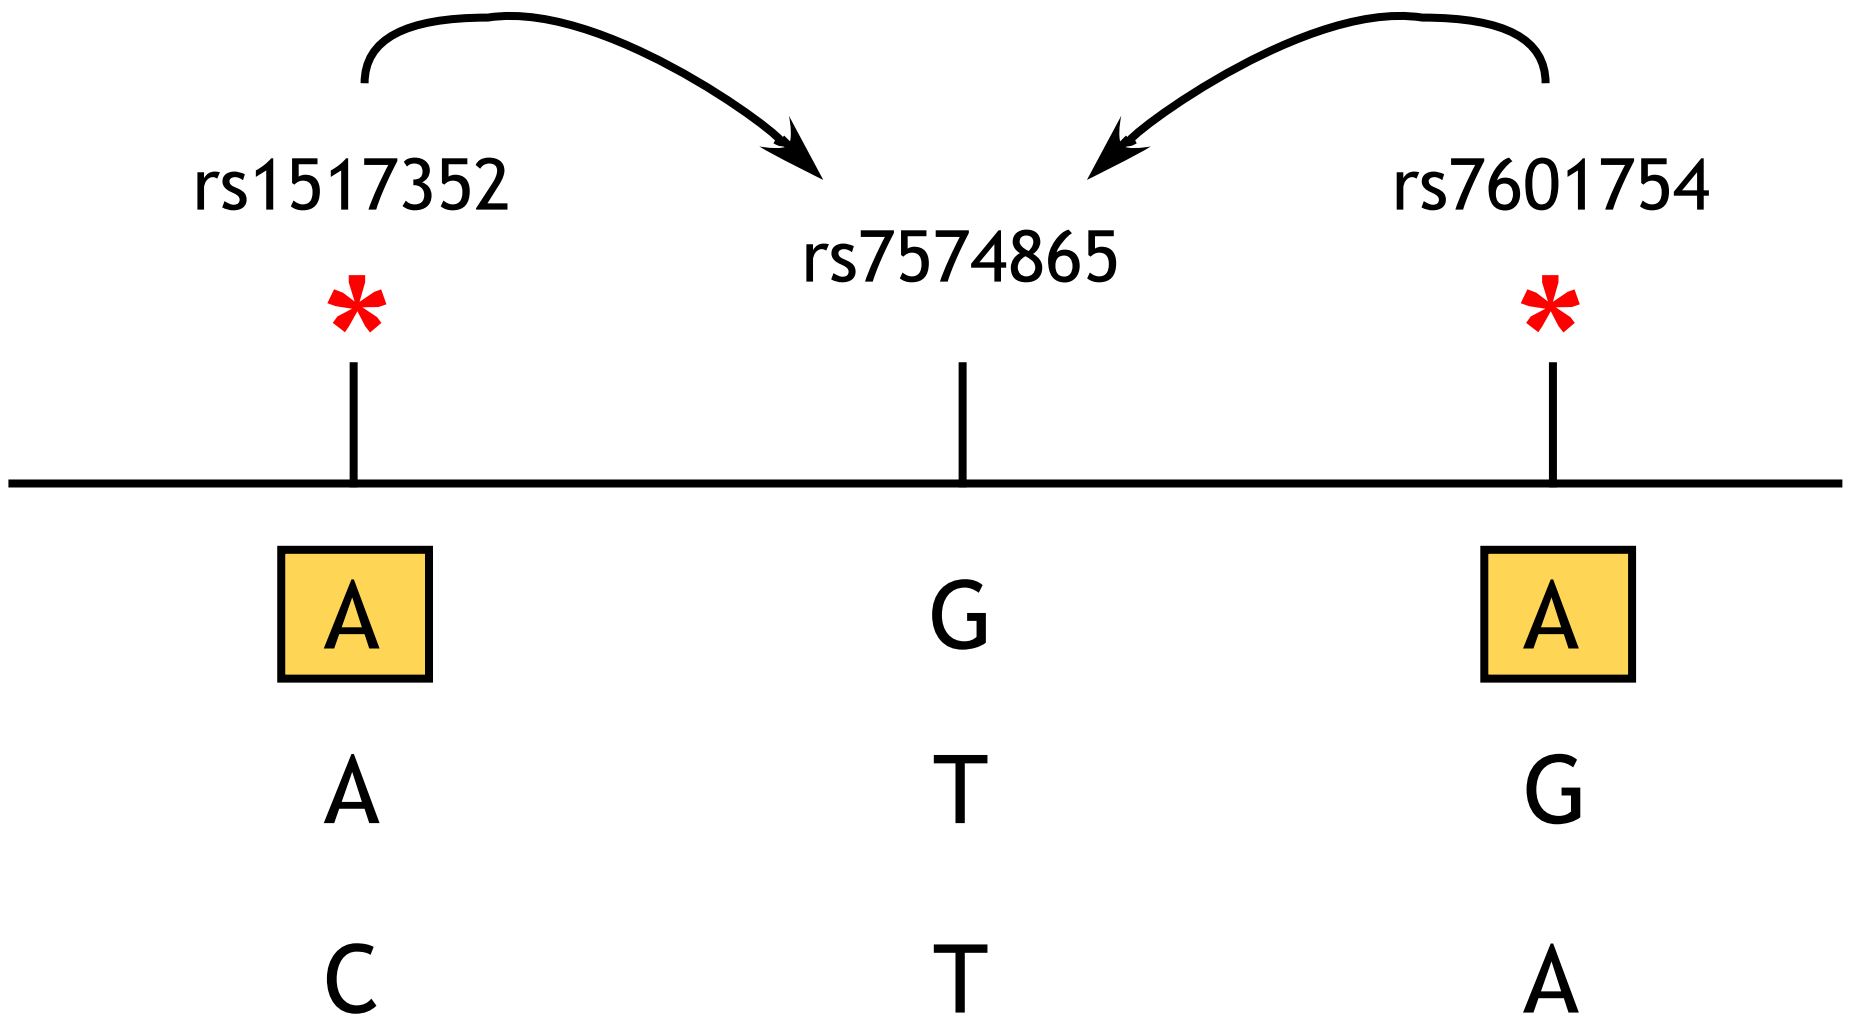

Supplement: nejm_remmers_977sa1.pdf [file nejm_remmers_977sa1.pdf]
